# Supplementary material for: Do resonance-assisted intramolecular halogen bonds exist without a charge transfer and a σ-hole?
Source: Royal Society of Chemistry journal article supplement (doi:10.1039/c5cp03625a), 2015-01-01
Supplement: c5cp03625a1.pdf [file c5cp03625a1.pdf]

| R <sub>1</sub> , R <sub>2</sub> , R <sub>3</sub> | Br---O | Br---S | Cl---O | Cl---S | F---O | F---S |
|--------------------------------------------------|--------|--------|--------|--------|-------|-------|
| $\Sigma_{VDW}$                                   | 3.37   | 3.65   | 3.27   | 3.55   | 2.99  | 3.27  |
| H, H,H                                           | 3.09   | 3.39   | 3.02   | 3.31   | 2.83  | 3.08  |
| NO <sub>2</sub> , H, H                           | 3.07   | 3.38   | 3.01   | 3.30   | 2.80  | 3.07  |
| H, NO <sub>2</sub> , H                           | 3.05   | 3.35   | 2.99   | 3.29   | 2.75  | 3.01  |
| H, H, NO <sub>2</sub>                            | 3.07   | 3.37   | 3.00   | 3.28   | 2.79  | 3.05  |
| CH <sub>3</sub> , H, H                           | 3.06   | 3.35   | 3.00   | 3.28   | 2.80  | 3.05  |
| H, CH <sub>3</sub> , H                           | 3.04   | 3.34   | 2.98   | 3.26   | 2.77  | 3.02  |
| H, H, CH <sub>3</sub>                            | 3.05   | 3.35   | 2.98   | 3.27   | 2.78  | 3.03  |
| NO <sub>2</sub> , H, CH <sub>3</sub>             | 3.04   | 3.34   | 2.97   | 3.26   | 2.76  | 3.03  |
| H, NO <sub>2</sub> , CH <sub>3</sub>             | 3.01   | 3.33   | 2.94   | 3.24   | 2.71  | 2.97  |
| CH <sub>3</sub> , H, NO <sub>2</sub>             | 3.04   | 3.35   | 2.97   | 3.26   | 2.77  | 3.02  |
| NO <sub>2</sub> , CH <sub>3</sub> , H            | 3.03   | 3.34   | 2.96   | 3.25   | 2.74  | 2.99  |
| CH <sub>3</sub> , NO <sub>2</sub> , H            | 3.16   | 3.87   | 3.07   | 3.73   | 2.84  | 3.31  |
| H, CH <sub>3</sub> , NO <sub>2</sub>             | 3.00   | 3.36   | 2.93   | 3.27   | 2.67  | 2.99  |

**Table S1: intramolecular halogen bond length (in Å) for all 78 interactions.**

| R <sub>1</sub> , R <sub>2</sub> , R <sub>3</sub> | Br---O | Br---S | Cl---O | Cl---S | F---O | F---S |
|--------------------------------------------------|--------|--------|--------|--------|-------|-------|
| H, H,H                                           | 69.53  | 73.78  | 72.54  | 77.16  | 82.46 | 87.81 |
| NO <sub>2</sub> , H, H                           | 69.92  | 74.09  | 73.10  | 77.52  | 83.45 | 88.38 |
| H, NO <sub>2</sub> , H                           | 69.95  | 74.25  | 73.15  | 77.12  | 84.22 | 89.62 |

|                                       |       |       |       |       |       |       |
|---------------------------------------|-------|-------|-------|-------|-------|-------|
| H, H, NO <sub>2</sub>                 | 69.53 | 74.01 | 72.43 | 77.22 | 81.66 | 87.01 |
| CH <sub>3</sub> , H, H                | 69.25 | 73.08 | 72.30 | 76.47 | 82.28 | 87.29 |
| H, CH <sub>3</sub> , H                | 69.88 | 74.28 | 76.08 | 77.92 | 83.54 | 89.17 |
| H, H, CH <sub>3</sub>                 | 71.55 | 76.04 | 74.69 | 79.51 | 84.85 | 90.40 |
| NO <sub>2</sub> , H, CH <sub>3</sub>  | 71.97 | 76.27 | 75.13 | 79.75 | 85.75 | 90.86 |
| H, NO <sub>2</sub> , CH <sub>3</sub>  | 73.28 | 77.21 | 76.69 | 81.02 | 87.85 | 93.29 |
| CH <sub>3</sub> , H, NO <sub>2</sub>  | 67.97 | 73.35 | 72.20 | 76.57 | 81.46 | 86.47 |
| NO <sub>2</sub> , CH <sub>3</sub> , H | 70.28 | 74.15 | 73.65 | 78.01 | 84.58 | 90.23 |
| CH <sub>3</sub> , NO <sub>2</sub> , H | 68.02 | 65.02 | 71.16 | 68.25 | 82.02 | 80.39 |
| H, CH <sub>3</sub> , NO <sub>2</sub>  | 69.20 | 72.39 | 72.81 | 76.04 | 84.97 | 88.15 |

---

***Table S2: intramolecular halogen bond angle (in °) for all 78 interactions.***
